# Supplementary material for: Ultra high-field (7 T) multi-resolution fMRI data for orientation decoding in visual cortex
Source: PubMed Central journal article supplement (PMC5459569; doi:10.1016/j.dib.2017.05.014), 2017-05-24
Supplement: mmc1.pdf [file mmc1.pdf]

**Conflict of interest : none**

The authors declare no competing interest.
